# Supplementary material
Source: HighWire-hosted journal article supplement (https://bmjopen.bmj.com/content/12/2/e055090)
Supplement: inline-supplementary-material-1 [file inline-supplementary-material-1.pdf]

**Supplemental Table 1. Incidence of postoperative symptomatic VTE**

|                                                                     | Total cases | VTE          | PE          | PE with hypoxia | PE with shock | PE with arrest |
|---------------------------------------------------------------------|-------------|--------------|-------------|-----------------|---------------|----------------|
| <b>Overall</b>                                                      | 203943      | 137 (0.067%) | 57 (0.028%) | 35 (0.017%)     | 9 (0.004%)    | 6 (0.003%)     |
| <b>Type of anaesthesia</b>                                          |             |              |             |                 |               |                |
| Inhalation general anaesthesia                                      | 110833      | 49 (0.044%)  | 23 (0.021%) | 13 (0.012%)     | 3 (0.003%)    | 1 (0.001%)     |
| Total venous general anaesthesia                                    | 25467       | 12 (0.047%)  | 3 (0.012%)  | 1 (0.004%)      | 1 (0.004%)    | 1 (0.004%)     |
| Inhalation general anaesthesia combined with regional anaesthesia   | 34872       | 46 (0.132%)  | 19 (0.054%) | 11 (0.032%)     | 2 (0.006%)    | 2 (0.006%)     |
| Total venous general anaesthesia combined with regional anaesthesia | 12863       | 10 (0.078%)  | 5 (0.039%)  | 4 (0.031%)      | 2 (0.016%)    | 1 (0.008%)     |
| Combined spinal and epidural anaesthesia                            | 4078        | 4 (0.098%)   | 0 (0.000%)  | 0 (0.000%)      | 0 (0.000%)    | 0 (0.000%)     |
| Epidural anaesthesia                                                | 623         | 0 (0.000%)   | 0 (0.000%)  | 0 (0.000%)      | 0 (0.000%)    | 0 (0.000%)     |
| Spinal anaesthesia                                                  | 13522       | 16 (0.118%)  | 7 (0.052%)  | 6 (0.044%)      | 1 (0.007%)    | 1 (0.007%)     |
| Conduction anaesthesia                                              | 560         | 0 (0.000%)   | 0 (0.000%)  | 0 (0.000%)      | 0 (0.000%)    | 0 (0.000%)     |
| Other                                                               | 1125        | 0 (0.000%)   | 0 (0.000%)  | 0 (0.000%)      | 0 (0.000%)    | 0 (0.000%)     |
| <b>ASA classification</b>                                           |             |              |             |                 |               |                |
| ASA PS class 1                                                      | 56196       | 16 (0.028%)  | 7 (0.012%)  | 5 (0.009%)      | 1 (0.002%)    | 1 (0.002%)     |
| ASA PS class 2                                                      | 98410       | 85 (0.086%)  | 37 (0.038%) | 22 (0.022%)     | 4 (0.004%)    | 2 (0.002%)     |

|                      |       |    |          |   |          |   |          |   |          |   |          |
|----------------------|-------|----|----------|---|----------|---|----------|---|----------|---|----------|
| ASA PS class 3       | 25563 | 17 | (0.067%) | 2 | (0.008%) | 2 | (0.008%) | 1 | (0.004%) | 1 | (0.004%) |
| ASA PS class 4       | 549   | 1  | (0.182%) | 0 | (0.000%) | 0 | (0.000%) | 0 | (0.000%) | 0 | (0.000%) |
| ASA PS class 5       | 11    | 0  | (0.000%) | 0 | (0.000%) | 0 | (0.000%) | 0 | (0.000%) | 0 | (0.000%) |
| ASA PS class 6       | 1     | 0  | (0.000%) | 0 | (0.000%) | 0 | (0.000%) | 0 | (0.000%) | 0 | (0.000%) |
| ASA PS class 1E      | 5300  | 3  | (0.057%) | 3 | (0.057%) | 0 | (0.000%) | 0 | (0.000%) | 0 | (0.000%) |
| ASA PS class 2E      | 9575  | 6  | (0.063%) | 5 | (0.052%) | 4 | (0.042%) | 2 | (0.021%) | 1 | (0.010%) |
| ASA PS class 3E      | 6514  | 5  | (0.077%) | 2 | (0.031%) | 1 | (0.015%) | 0 | (0.000%) | 0 | (0.000%) |
| ASA PS class 4E      | 1446  | 4  | (0.277%) | 1 | (0.069%) | 1 | (0.069%) | 1 | (0.069%) | 1 | (0.069%) |
| ASA PS class 5E      | 109   | 0  | (0.000%) | 0 | (0.000%) | 0 | (0.000%) | 0 | (0.000%) | 0 | (0.000%) |
| ASA PS class 6E      | 1     | 0  | (0.000%) | 0 | (0.000%) | 0 | (0.000%) | 0 | (0.000%) | 0 | (0.000%) |
| Classification error | 268   | -  | -        | - | -        | - | -        | - | -        | - | -        |

Surgical position

|                    |        |     |          |    |          |    |          |   |          |   |          |
|--------------------|--------|-----|----------|----|----------|----|----------|---|----------|---|----------|
| Supine position    | 147838 | 100 | (0.068%) | 39 | (0.026%) | 22 | (0.015%) | 5 | (0.003%) | 3 | (0.002%) |
| Prone position     | 10106  | 6   | (0.059%) | 2  | (0.020%) | 2  | (0.020%) | 1 | (0.010%) | 1 | (0.010%) |
| Lateral position   | 20642  | 18  | (0.087%) | 7  | (0.034%) | 4  | (0.019%) | 2 | (0.010%) | 2 | (0.010%) |
| Lithotomy position | 22882  | 11  | (0.048%) | 8  | (0.035%) | 6  | (0.026%) | 1 | (0.004%) | 0 | (0.000%) |
| Sitting position   | 1069   | 0   | (0.000%) | 0  | (0.000%) | 0  | (0.000%) | 0 | (0.000%) | 0 | (0.000%) |
| Other              | 1406   | 2   | (0.142%) | 1  | (0.071%) | 1  | (0.071%) | 0 | (0.000%) | 0 | (0.000%) |

Age (years old)

|      |       |   |          |   |          |   |          |   |          |   |          |
|------|-------|---|----------|---|----------|---|----------|---|----------|---|----------|
| 0-5  | 9518  | 0 | (0.000%) | 0 | (0.000%) | 0 | (0.000%) | 0 | (0.000%) | 0 | (0.000%) |
| 6-18 | 10255 | 2 | (0.020%) | 0 | (0.000%) | 0 | (0.000%) | 0 | (0.000%) | 0 | (0.000%) |

|                      |       |    |          |    |          |    |          |   |          |   |          |
|----------------------|-------|----|----------|----|----------|----|----------|---|----------|---|----------|
| 19-65                | 99283 | 47 | (0.047%) | 19 | (0.019%) | 11 | (0.011%) | 4 | (0.004%) | 3 | (0.003%) |
| 66-85                | 79796 | 82 | (0.103%) | 36 | (0.045%) | 22 | (0.028%) | 4 | (0.005%) | 2 | (0.003%) |
| 86-                  | 5081  | 6  | (0.118%) | 2  | (0.039%) | 2  | (0.039%) | 1 | (0.020%) | 1 | (0.020%) |
| Classification error | 10    | -  | -        | -  | -        | -  | -        | - | -        | - | -        |

Sex

|                      |        |    |          |    |          |    |          |   |          |   |          |
|----------------------|--------|----|----------|----|----------|----|----------|---|----------|---|----------|
| Men                  | 99712  | 45 | (0.045%) | 16 | (0.016%) | 10 | (0.010%) | 2 | (0.002%) | 1 | (0.001%) |
| Women                | 104223 | 92 | (0.088%) | 41 | (0.039%) | 25 | (0.024%) | 7 | (0.007%) | 5 | (0.005%) |
| Classification error | 8      | -  | -        | -  | -        | -  | -        | - | -        | - | -        |

All data were described as number and percentage.

Abbreviations: ASA PS, American society anesthesiologists performance status; PE, pulmonary embolism; VTE, venous thromboembolism

Supplemental Table 2. Details of clinical events within 90 days after postoperative symptomatic VTE events

| Case Number            | Age | Sex   | BMI  | Time from index VTE to events (days) | Types of index VTE | Time from surgery to index VTE (days) | Surgical site | ASA classification | Type of anaesthesia | Surgical position  | Preexisting Medical Conditions | History of VTE or major bleeding |
|------------------------|-----|-------|------|--------------------------------------|--------------------|---------------------------------------|---------------|--------------------|---------------------|--------------------|--------------------------------|----------------------------------|
| Cases of recurrent VTE |     |       |      |                                      |                    |                                       |               |                    |                     |                    |                                |                                  |
| 1                      | 73  | Woman | 24.8 | 9                                    | PE with DVT        | 5                                     | Brain         | 2                  | GA(I)               | Spinal position    |                                |                                  |
| 2                      | 69  | Woman | 26.5 | 48                                   | PE                 | 4                                     | Upper abdomen | 2                  | GA(I) with RA       | Spinal position    | AC                             |                                  |
| 3                      | 75  | Man   | 21.3 | 27                                   | PE with DVT        | 21                                    | Lower abdomen | 2                  | SA                  | Lithotomy position | HT, DM, CKD, AC                |                                  |
| 4                      | 53  | Man   | 21.6 | 7                                    | DVT                | 11                                    | Brain         | 2                  | GA(I)               | Spinal position    | HT, CKD                        |                                  |
| 5                      | 40  | Woman | 14.3 | 59                                   | DVT                | 7                                     | Lower abdomen | 2                  | GA(I) with RA       | Spinal position    | CKD, AC                        |                                  |
| 6                      | 60  | Woman | 25.8 | 38                                   | DVT                | 6                                     | Lower abdomen | 1                  | TIVA                | Spinal position    | CKD                            |                                  |

|                         |    |       |      |    |             |    |               |    |               |                 |                    |                     |
|-------------------------|----|-------|------|----|-------------|----|---------------|----|---------------|-----------------|--------------------|---------------------|
| 7                       | 75 | Woman | 17.7 | 17 | DVT         | 4  | Lower abdomen | 2  | GA(I) with RA | Spinal position | CKD (Dialysis), AC | Major bleeding      |
| Cases of major bleeding |    |       |      |    |             |    |               |    |               |                 |                    |                     |
| 1                       | 73 | Woman | 24.8 | 25 | PE with DVT | 5  | Brain         | 2  | GA(I)         | Spinal position |                    |                     |
| 5                       | 40 | Woman | 14.3 | 44 | DVT         | 7  | Lower abdomen | 2  | GA(I) with RA | Spinal position | CKD, AC            |                     |
| 7                       | 75 | Woman | 17.7 | 62 | DVT         | 4  | Lower abdomen | 2  | GA(I) with RA | Spinal position | CKD (Dialysis), AC | Major bleeding      |
| 8                       | 62 | Woman | 22.3 | 3  | PE          | 10 | Brain         | 2  | TIVA          | Spinal position | AC                 | VTE, Major bleeding |
| 9                       | 49 | Man   | 22.5 | 4  | PE          | 1  | Brain         | 2  | GA(I)         | Spinal position | HT, Af, AC         |                     |
| 10                      | 59 | Woman | 22.4 | 16 | PE with DVT | 20 | Brain         | 3E | GA(I)         | Spinal position | HT, CKD,           | Major bleeding      |

|    |    |       |      |    |             |   |                          |    |       |                  |         |
|----|----|-------|------|----|-------------|---|--------------------------|----|-------|------------------|---------|
| 11 | 50 | Man   | 23.5 | 14 | PE with DVT | 7 | Head, pharynx, larynx    | 2E | GA(I) | Spinal position  | AC      |
| 12 | 93 | Woman | 15.5 | 1  | PE          | 0 | Hip, upper / lower limbs | 2  | SA    | Lateral position | HT, CKD |
| 13 | 55 | Woman | 20.2 | 6  | DVT         | 2 | Hip, upper / lower limbs | 3  | SA    | Spinal position  | MI, CTD |

Cases of all-cause death

|    |    |       |      |    |             |    |                          |    |               |                  |                    |                |
|----|----|-------|------|----|-------------|----|--------------------------|----|---------------|------------------|--------------------|----------------|
| 7  | 75 | Woman | 17.7 | 85 | DVT         | 4  | Lower abdomen            | 2  | GA(I) with RA | Spinal position  | CKD (Dialysis), AC | Major bleeding |
| 10 | 59 | Woman | 22.4 | 17 | PE with DVT | 20 | Brain                    | 3E | GA(I)         | Spinal position  | HT, CKD,           | Major bleeding |
| 12 | 93 | Woman | 15.5 | 10 | PE          | 0  | Hip, upper / lower limbs | 2  | SA            | Lateral position | HT, CKD            |                |

|    |    |       |      |    |             |    |                          |    |               |                  |             |                |
|----|----|-------|------|----|-------------|----|--------------------------|----|---------------|------------------|-------------|----------------|
| 14 | 65 | Man   | 23.0 | 1  | PE          | 1  | Thorax                   | 3  | GA(I) with RA | Lateral position | CLD, LC     |                |
| 15 | 66 | Woman | 27.3 | 1  | PE with DVT | 8  | Spine                    | 2  | TIVA          | Prone position   | HT, DM      |                |
| 16 | 42 | Woman | 25.9 | 1  | PE          | 20 | Hip, upper / lower limbs | 2E | TIVA with RA  | Spinal position  |             |                |
| 17 | 68 | Man   | 24.4 | 34 | DVT         | 29 | Hip, upper / lower limbs | 3  | SA            | Spinal position  | DM, CKD, AC | Major bleeding |

Abbreviations: BMI, body mass index; DVT, deep venous thrombosis; PE, pulmonary embolism; VTE, venous thromboembolism; GA(I), inhalation general anaesthesia; TIVA, total venous general anaesthesia; GA(I) with RA, inhalation general anaesthesia combined with regional anaesthesia; TIVA with RA, total venous general anaesthesia combined with regional anaesthesia; SA, Spinal anaesthesia, AC, active cancer; Af, atrial fibrillation; CKD, chronic kidney disease; CLD, chronic lung disease; CTD, connective tissue disease; DM, diabetes mellitus; HT, hypertension; LC, liver cirrhosis; MI, myocardial infarction
